# Supplementary material for: Perampanel’s forgiveness factor in a variable medication adherence paradigm in a rat model of chronic epilepsy
Source: Springer Nature journal article supplement (doi:10.1186/s12967-023-04490-z), 2023-09-20
Supplement: MOESM1 [file 26065728]

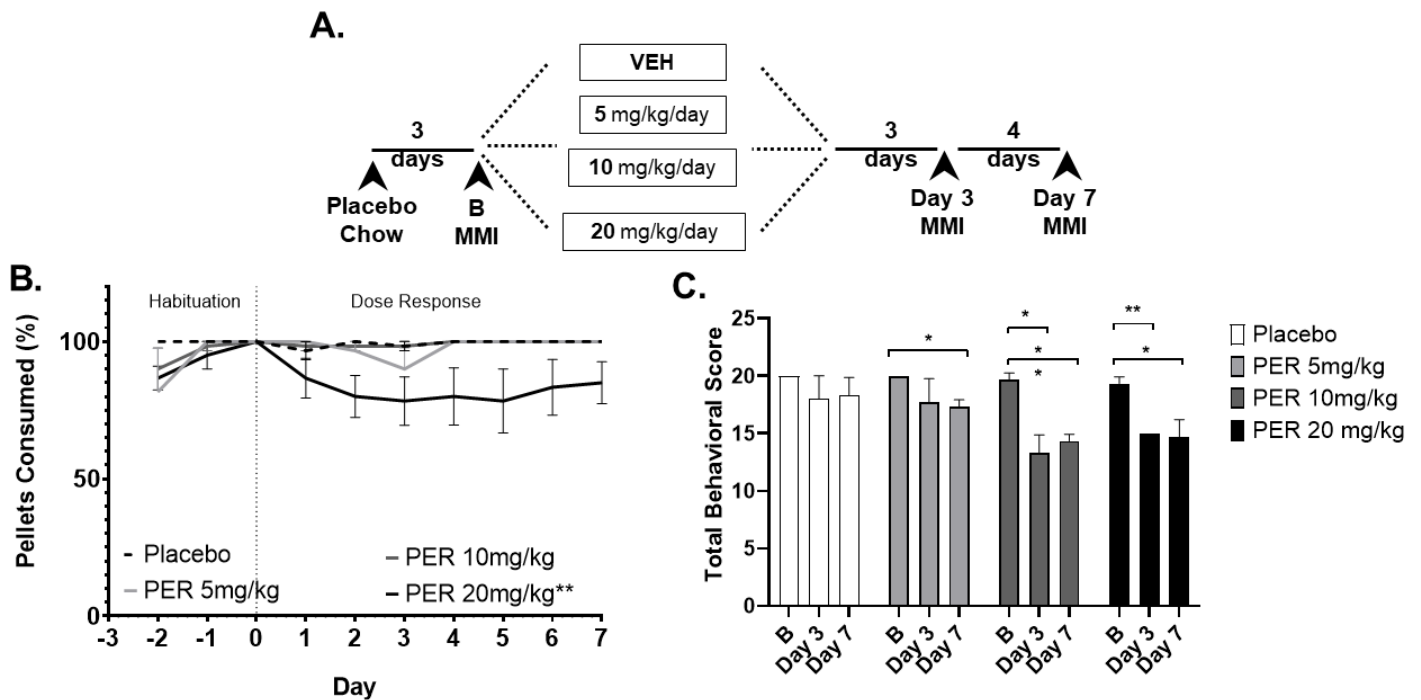

**Additional File 1: Figure S1: Dose-Finding Study in Naïve Male Age-Matched Sprague Dawley Rats. A.** Schematic of 10-day dose finding study. Animals were habituated to automated feeder system with 3-days of placebo feeding (15 g/kg, q.i.d.) before randomizing to 1 of 4 treatment groups: PCBO, 5, 10, 20 mg/kg/day of PER. Minimal motor impairment (MMI) was evaluated at baseline, and 3- and 7-days after the initiation of PER treatment. MMI defined as the sum score of 5 criteria, each evaluated on a scale of 1 (completely impaired) to 4 (no impairment). Criteria included: home-cage activity, gait, grip reflex, hind limb extension, righting reflex. **B.** Daily pellet consumption over 10-day study. Significantly different from all treatment groups at  $**p < 0.01$  as determined by repeated measures 2-way ANOVA with Tukey's multiple comparisons. **C.** Total MMI score for all rats at baseline, 3- and 7-days post PER treatment. Data presented as mean  $\pm$  SEM. Significantly different at  $*p < 0.05$ ,  $**p < 0.01$  as determined by 2-way ANOVA with Dunnett's Multiple Comparisons;  $n = 4/\text{group}$
