# Supplementary material for: Perampanel’s forgiveness factor in a variable medication adherence paradigm in a rat model of chronic epilepsy
Source: Springer Nature journal article supplement (doi:10.1186/s12967-023-04490-z), 2023-09-20
Supplement: MOESM2 [file 26065728]

**Additional File 2: Table S1: Demographic and Baseline Characteristics of Animals Enrolled in Study**

|                                               | <b>100% Adherent</b><br>(~10 mg/kg/day)<br>N = 10 | <b>50% Adherent</b><br>(~5 mg/kg/day)<br>N =12 | <b>Attrition</b><br>(mortality, head cap loss)<br>N = 28 |
|-----------------------------------------------|---------------------------------------------------|------------------------------------------------|----------------------------------------------------------|
| <b>Weight (g)</b>                             |                                                   |                                                |                                                          |
| Kainic Acid SE                                | 209 ± 9.5                                         | 211 ± 11                                       | 214 ± 11                                                 |
| Baseline (end)                                | 647 ± 68.75                                       | 651 ± 64.85                                    | --                                                       |
| Treatment (end)                               | 710 ± 94                                          | 701 ± 72                                       | --                                                       |
| <b>Kainic Acid Dose (mg/kg)</b>               | 19 ± 7.7                                          | 20 ± 7.8                                       | 20 ± 5.5                                                 |
| SE Score <sup>‡</sup>                         | 2.827 ± 0.324                                     | 2.938 ± 0.228                                  | 3.787 ± 0.881*                                           |
| <b>Enrollment onto PER</b><br>(weeks post-KA) | 14.9 ± 1.9                                        | 13.6 ± 1.1                                     | --                                                       |

<sup>‡</sup>Seizure Score defined as average Racine Score

\*Significantly different from 100% and 50% groups at p<0.05 as determined by Kruskal-Wallis test with Dunn's multiple comparisons

Data presented as mean ± SD.

PER: perampanel; N = number of animals; KA = kainic acid
