# Supplementary material for: Perampanel’s forgiveness factor in a variable medication adherence paradigm in a rat model of chronic epilepsy
Source: Springer Nature journal article supplement (doi:10.1186/s12967-023-04490-z), 2023-09-20
Supplement: MOESM3 [file 26065728]

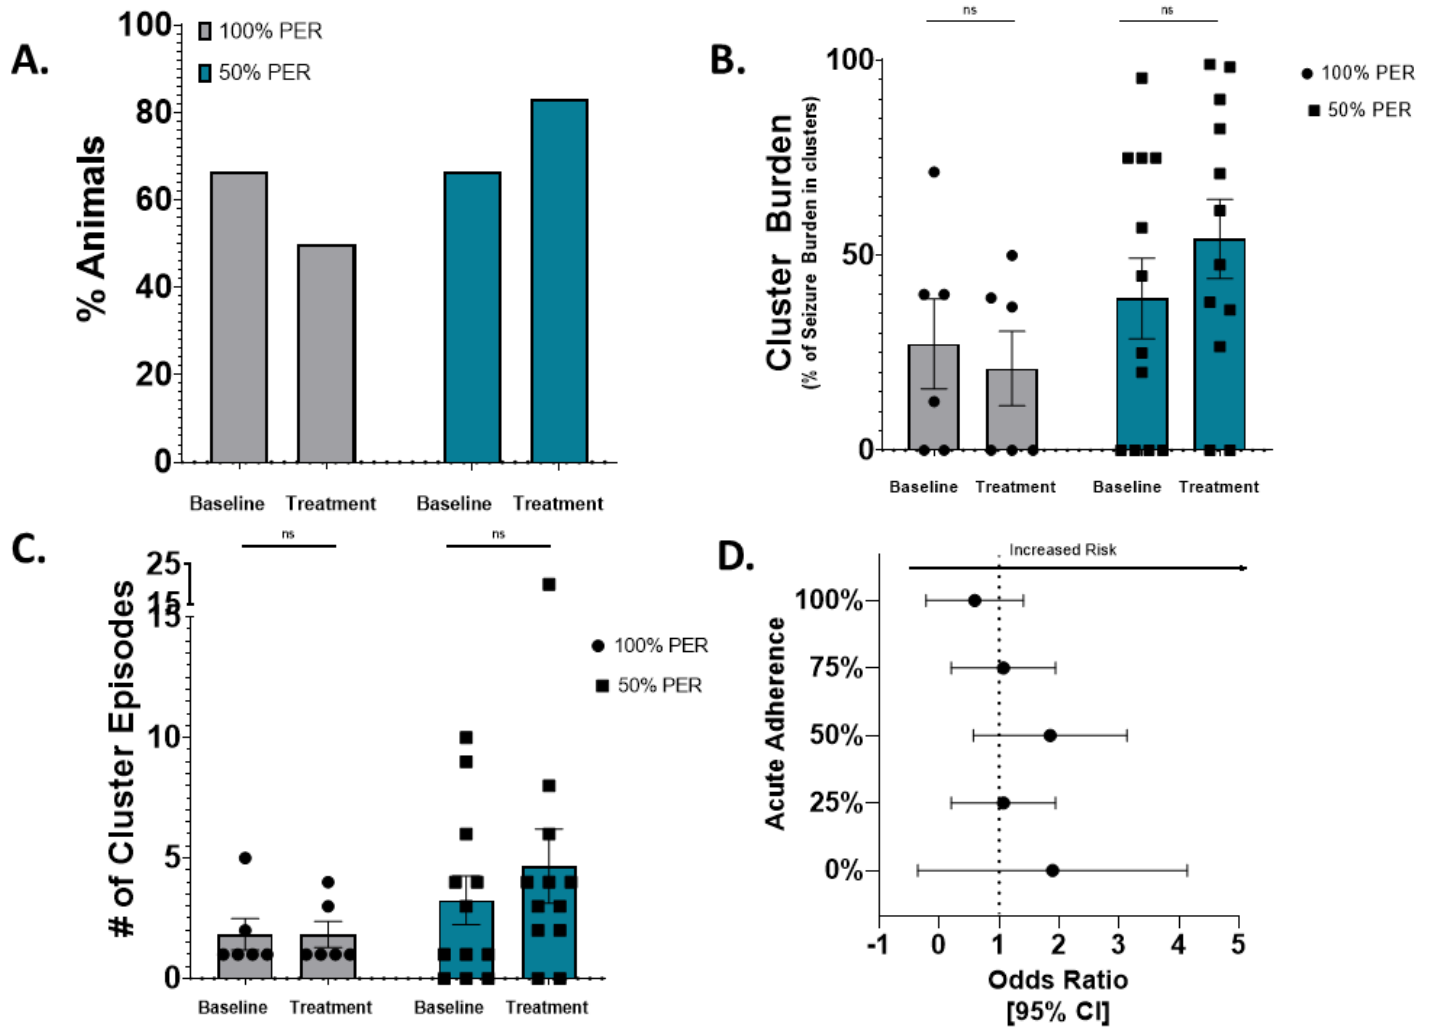

**Additional File 3: Figure S2: PER does not alter seizure cluster phenotype when administered in a fully adherent or variably adherent paradigm.** **A.** Percentage of animals that present with seizure clusters (e.g., 2+ seizures occurring between mealtimes or every 6-hours) during baseline or treatment periods in the 100% (gray, n=7) and 50% (teal, n=12) animals. **B.** Total percentage of seizure burden that forms as cluster (2+ seizures within 6-hour) during baseline and treatment periods for 100% (gray) and 50% (teal) groups. Data presented as mean  $\pm$  SEM. Ns = not significantly different as determined by repeated measures 2-way ANOVA. **C.** Total # of cluster episodes during baseline and treatment periods for 100% (gray) and 50% (teal) groups. Data presented as mean  $\pm$  SEM. Ns = not significantly different as determined by repeated measures 2-way ANOVA. **D.** Odds ratios computed for the relationship between patterns of acute adherence and the occurrence of a seizure. Data presented as the odds ratio  $\pm$  95% CI. Any CI that does not cross one indicates a significant relationship between a missed meal and a seizure as determined by Chi-Square analysis. Only those animals with seizures during baseline and treatment periods included in analysis.
